# Supplementary material for: GUCY2C Opposes Systemic Genotoxic Tumorigenesis by Regulating AKT-Dependent Intestinal Barrier Integrity
Source: PubMed Central journal article supplement (PMC3284579; doi:10.1371/journal.pone.0031686), 2012-02-22

Figure S1

### Body Weight

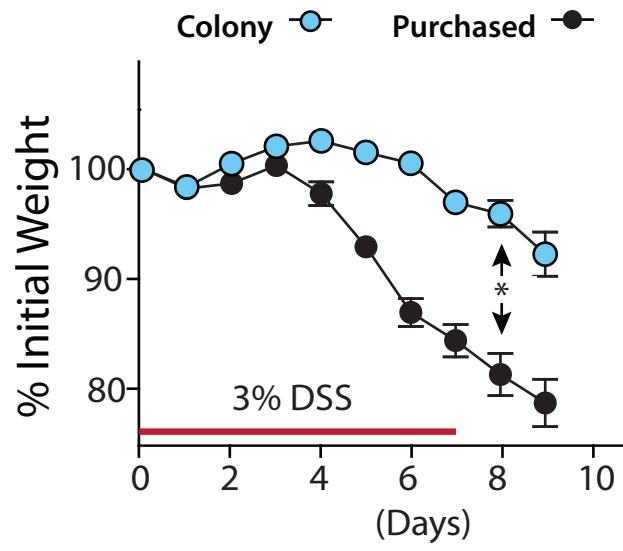

Supplement: pone.0031686.s001.pdf [file pone.0031686.s001.pdf]
